# Supplementary material
Source: PubMed Central journal article supplement (PMC3571996)
Supplement: cbt-14-146-s01.pdf [file cbt-14-146-s01.pdf]

## **Supplemental Material to:**

**Yoshimichi Tanaka, Yoshito Terai, Hiroshi Kawaguchi,  
Satoe Fujiwara, Saha Yoo, Satoshi Tsunetoh, et al.**

**Prognostic impact of EMT (epithelial-mesenchymal-  
transition)-related protein expression  
in endometrial cancer**

**Cancer Biology & Therapy 2012; 14(1)  
<http://dx.doi.org/10.4161/cbt.22625>**

**<http://www.landesbioscience.com/journals/cbt/article/22625/>**

Figure s1

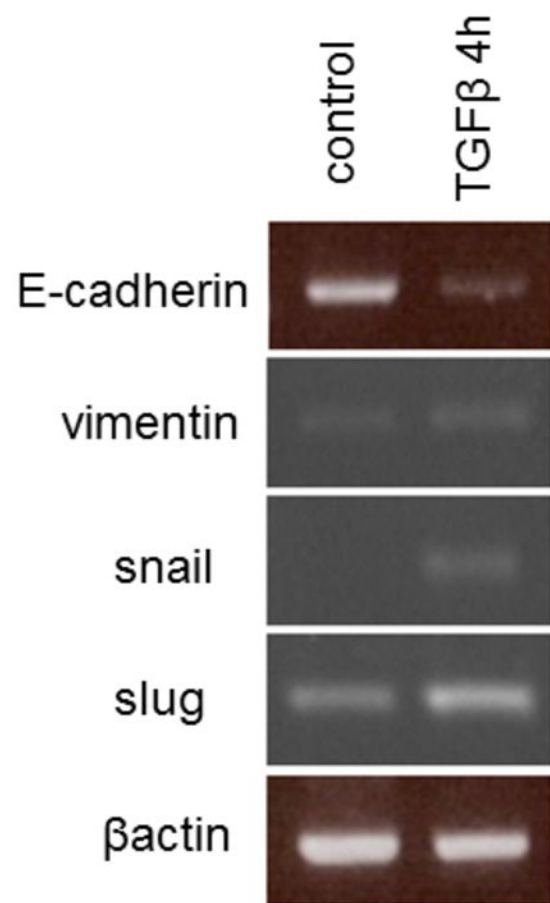

Control

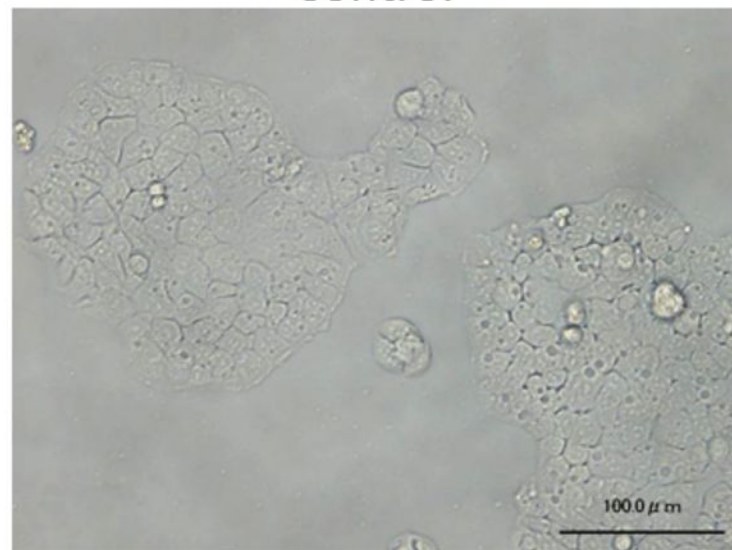

TGF $\beta$  48hr

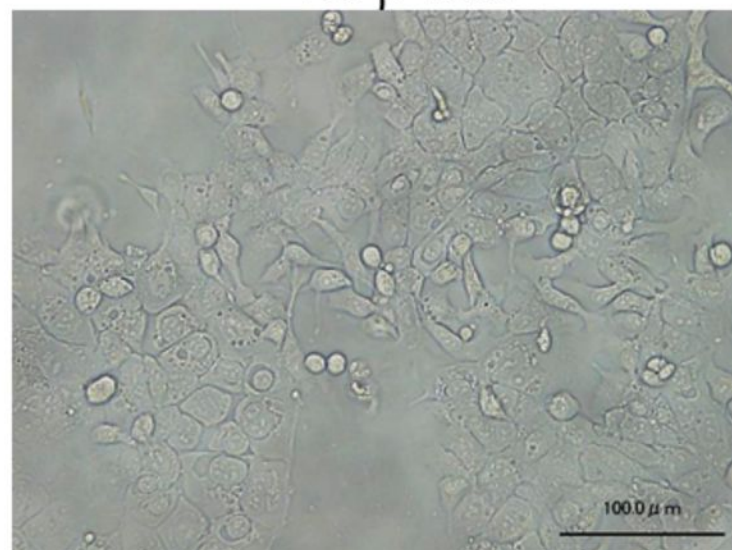

Figure s2

Vimentin

TWIST

Endometrioid  
negative

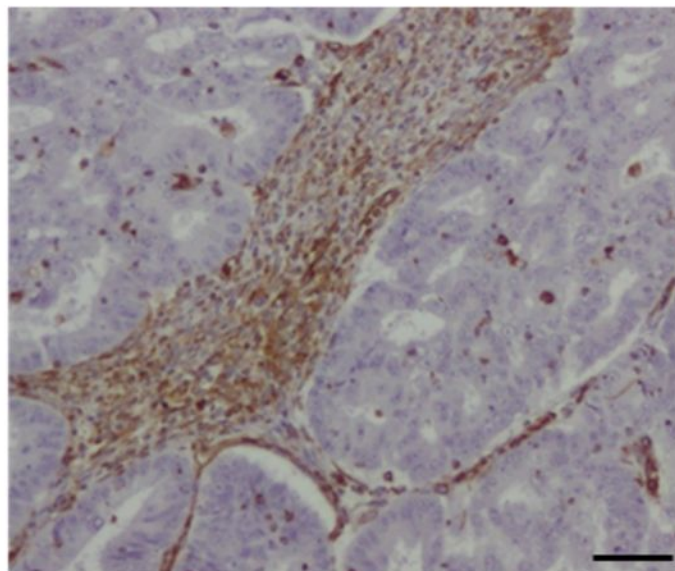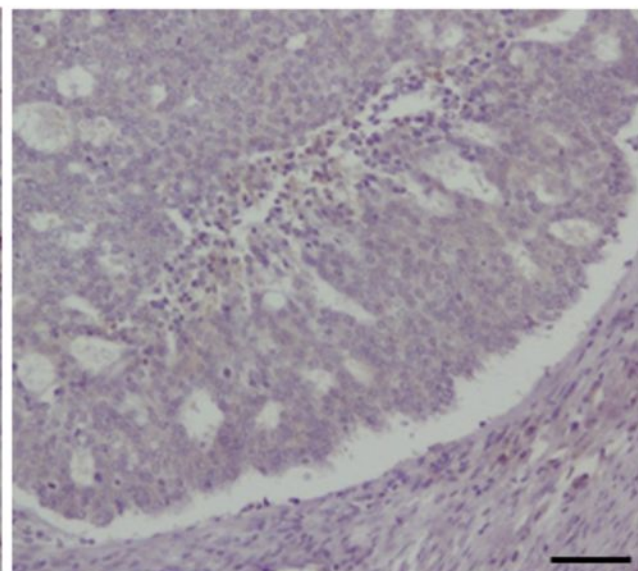

Endometrioid  
positive

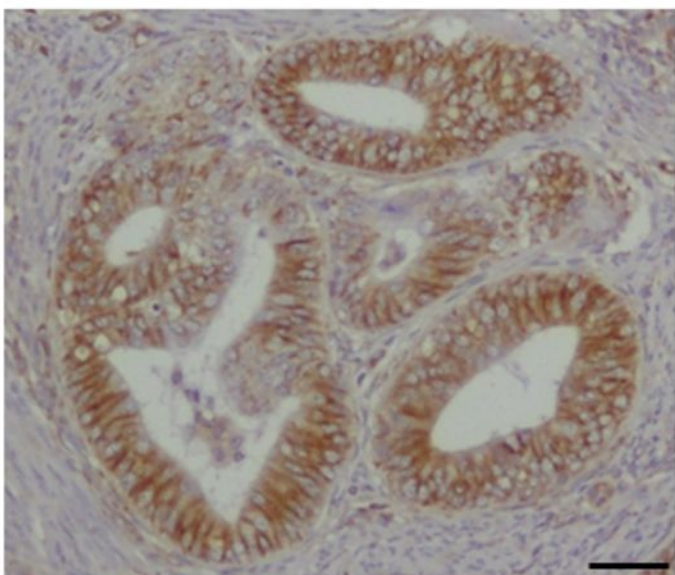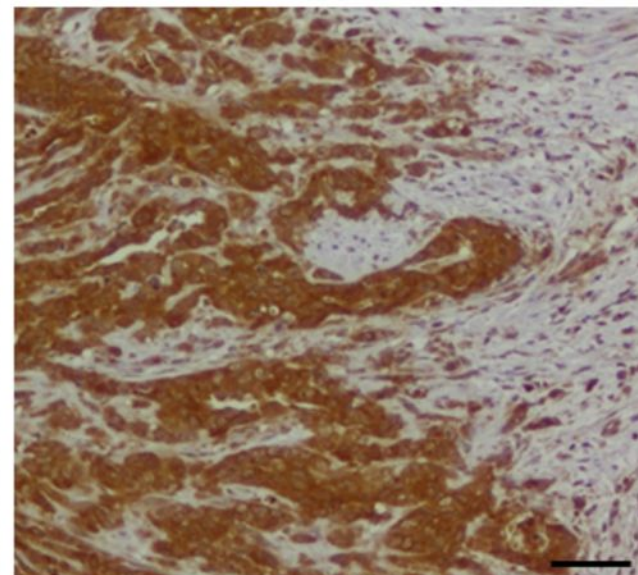

Table s1. Results of immunohistochemistry

|                              | Vimentin    |             |         | TWIST       |             |         |
|------------------------------|-------------|-------------|---------|-------------|-------------|---------|
|                              | negative(%) | positive(%) | P-value | negative(%) | positive(%) | P-value |
| <b>Age</b>                   |             |             | 0.2626  |             |             | 0.8921  |
| < 50                         | 40(58.8)    | 28(41.2)    |         | 40(58.8)    | 28(41.2)    |         |
| ≥ 50                         | 189(66.1)   | 97(33.9)    |         | 165(57.7)   | 121(42.3)   |         |
| <b>BMI</b>                   |             |             | 0.1855  |             |             | 0.2745  |
| < 30                         | 203(63.4)   | 117(36.6)   |         | 182(56.9)   | 138(43.1)   |         |
| ≥ 30                         | 26(76.4)    | 8(23.6)     |         | 23(67.6)    | 11(32.4)    |         |
| <b>Histology</b>             |             |             | <0.0001 |             |             | 0.0018  |
| AEH                          | 4(23.5)     | 13(76.5)    |         | 13(76.5)    | 4(23.5)     |         |
| endometrioid G1              | 106(66.7)   | 53(33.3)    |         | 101(63.5)   | 58(36.5)    |         |
| endometrioid G2              | 37(75.5)    | 12(24.5)    |         | 31(63.3)    | 18(36.7)    |         |
| endometrioid G3              | 36(81.8)    | 8(18.2)     |         | 23(52.3)    | 21(47.7)    |         |
| adenocarcinoma               | 6(33.3)     | 12(66.7)    |         | 4(22.2)     | 14(77.8)    |         |
| serous                       | 16(88.9)    | 2(10.2)     |         | 8(44.4)     | 10(55.6)    |         |
| clear                        | 10(100.0)   | 0(0.0)      |         | 3(30.0)     | 7(70.0)     |         |
| carcinosarcoma               | 0(0.0)      | 22(100.0)   |         | 9(40.9)     | 13(59.1)    |         |
| others                       | 14(82.4)    | 3(17.6)     |         | 13(76.5)    | 4(23.5)     |         |
| <b>FIGO stage</b>            |             |             | 0.0033  |             |             | 0.0130  |
| 0                            | 4(23.5)     | 13(76.5)    |         | 13(76.5)    | 4(23.5)     |         |
| I                            | 153(69.5)   | 67(30.5)    |         | 136(61.8)   | 84(38.2)    |         |
| II                           | 14(66.7)    | 7(33.3)     |         | 13(61.9)    | 8(38.1)     |         |
| III                          | 44(59.5)    | 30(40.5)    |         | 36(48.6)    | 38(51.4)    |         |
| IV                           | 14(63.6)    | 8(36.4)     |         | 7(31.8)     | 15(68.2)    |         |
| <b>Myometrial invasion</b>   |             |             | 0.5456  |             |             | 0.0998  |
| < 50%                        | 163(65.7)   | 85(34.3)    |         | 151(60.9)   | 97(39.1)    |         |
| ≥ 50%                        | 66(62.3)    | 40(37.7)    |         | 54(50.9)    | 52(49.1)    |         |
| <b>Peritoneal cytology</b>   |             |             | 0.8757  |             |             | 0.0063  |
| positive                     | 33(63.5)    | 19(36.5)    |         | 21(40.4)    | 31(59.6)    |         |
| negative                     | 196(64.9)   | 106(35.1)   |         | 184(60.9)   | 118(39.1)   |         |
| <b>Lymph node metastasis</b> |             |             | 0.8507  |             |             | 0.5857  |
| positive                     | 23(67.6)    | 11(32.4)    |         | 18(52.9)    | 16(47.1)    |         |

|          |           |           |           |           |
|----------|-----------|-----------|-----------|-----------|
| negative | 206(64.4) | 114(35.6) | 187(58.4) | 133(41.6) |
|----------|-----------|-----------|-----------|-----------|

---
